# Supplementary material
Source: PubMed Central journal article supplement (PMC11537720)
Supplement: NIHMS2030058-supplement-Supplementary_Information.pdf [file NIHMS2030058-supplement-Supplementary_Information.pdf]

Supplementary Information for

**Structures of the ribosome bound to EF-Tu–isoleucine  
tRNA elucidate the mechanism of AUG avoidance**

Mariia Yu. Rybak<sup>1</sup> and Matthieu G. Gagnon<sup>1,2,3,4,\*</sup>

<sup>1</sup> Department of Microbiology and Immunology, University of Texas Medical Branch,  
Galveston, Texas 77555, USA.

<sup>2</sup> Department of Biochemistry and Molecular Biology, University of Texas Medical Branch,  
Galveston, Texas 77555, USA.

<sup>3</sup> Sealy Center for Structural Biology and Molecular Biophysics, University of Texas Medical  
Branch, Galveston, Texas 77555, USA.

<sup>4</sup> Institute for Human Infections and Immunity, University of Texas Medical Branch, Galveston,  
Texas 77555, USA.

\*email: [magagnon@utmb.edu](mailto:magagnon@utmb.edu)

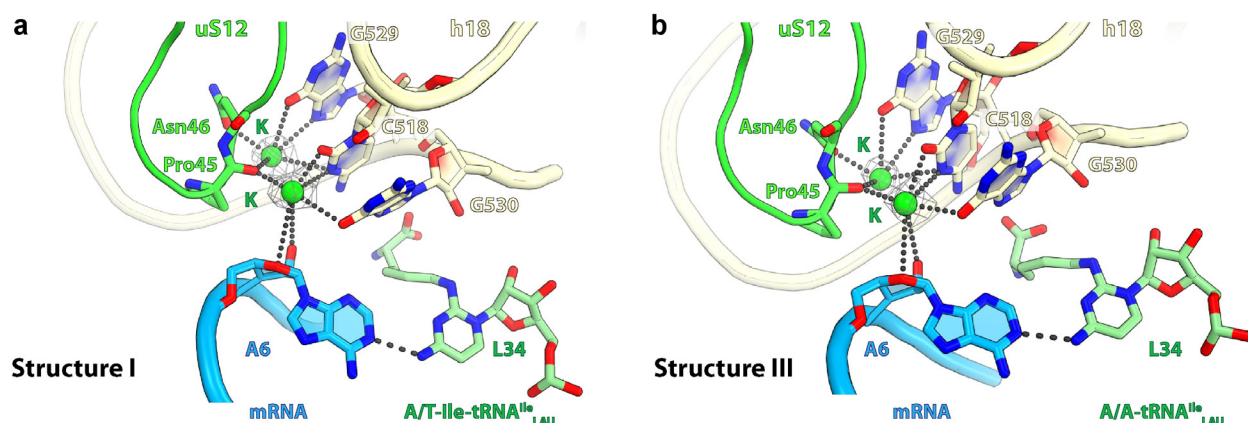

**Supplementary Fig. 1. Potassium ions in the ribosome decoding center.** Stabilization of the decoding center by potassium ions (green spheres) upon binding of the A-site tRNA<sup>Ile</sup><sub>LAU</sub> in structures I (a) and III (b), as previously observed in an elongation ribosome complex<sup>1</sup>. The stabilization of the third nucleotide of the A-site codon (A6) by potassium in both structures suggests that the ASL of the tRNA<sup>Ile</sup><sub>LAU</sub> is fully accommodated into the A site. The Coulomb potential density of the K<sup>+</sup> ions (gray mesh) is contoured at 2.9σ. The gray dashed lines indicate putative hydrogen bonds.

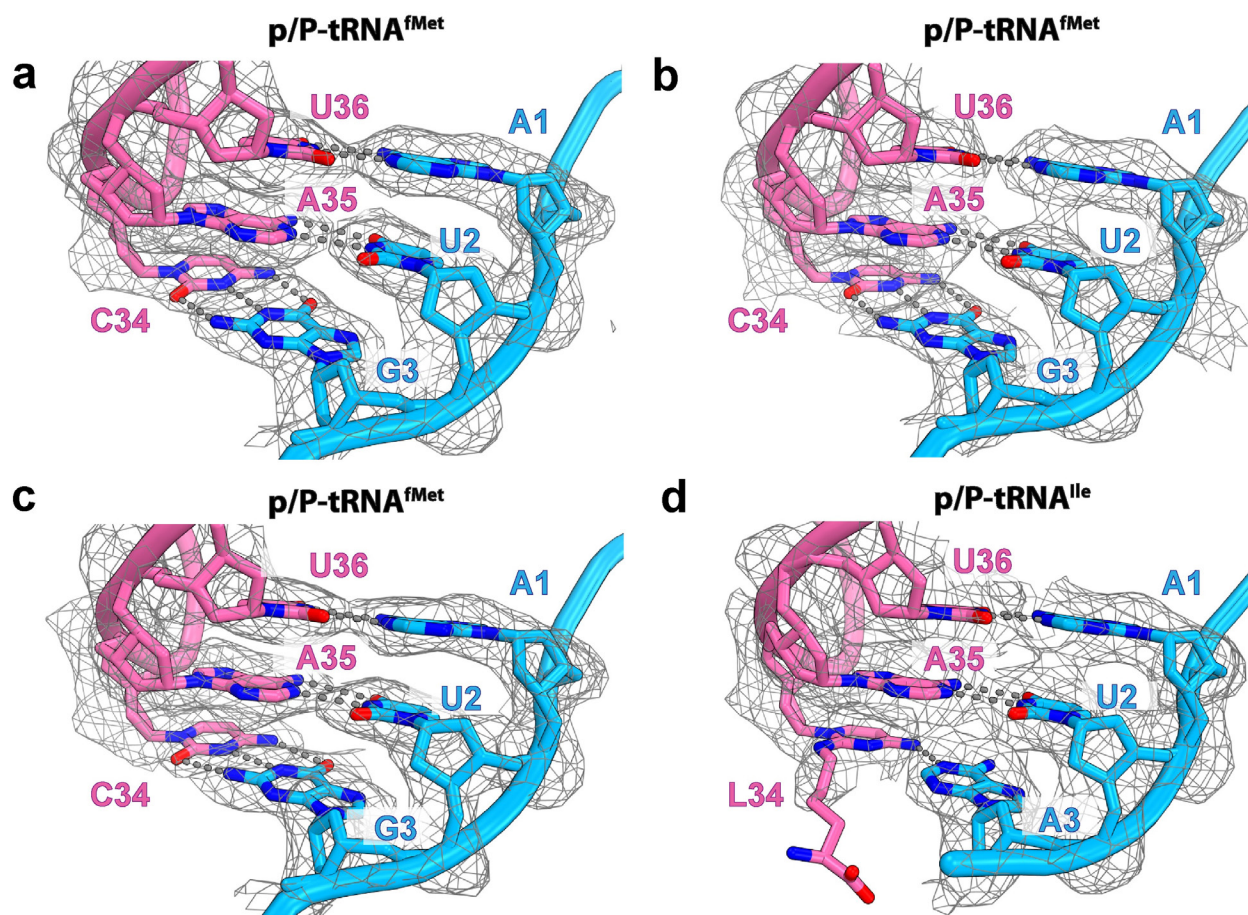

**Supplementary Fig. 2. Interactions between the P-site tRNA and mRNA in structures I-IV.** In structures I (a), II (b) and III (c), initiator tRNA<sup>fMet</sup> is bound to the P-site AUG codon, while in structure IV (d), tRNA<sup>Ile</sup><sub>LAU</sub> is bound to the P-site AUA codon. The Coulomb potential density (gray mesh) is contoured at  $2.9\sigma$ . Putative hydrogen bonds are indicated by the gray dashed lines.

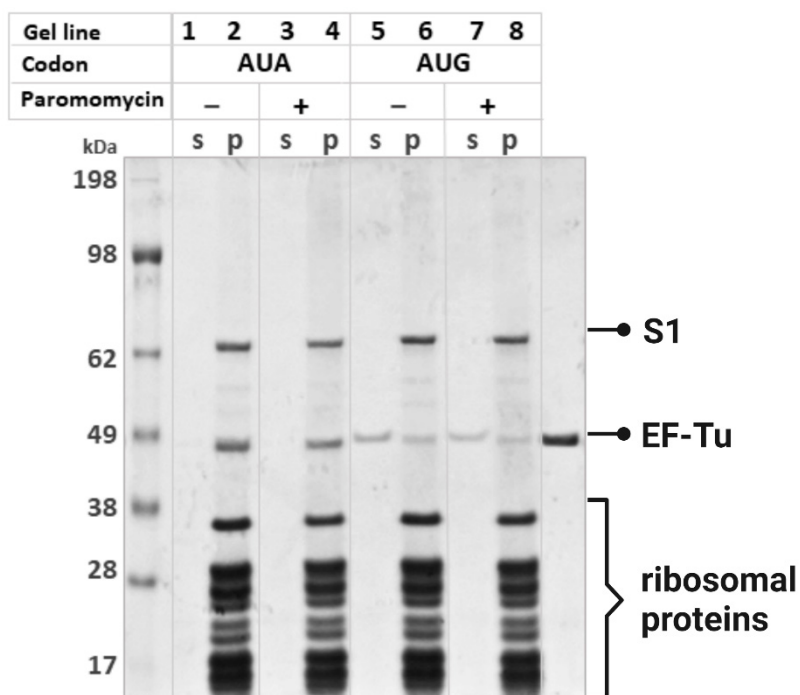

**Supplementary Fig. 3. Co-sedimentation assay assessing the binding of EF-Tu•Ile-tRNA<sup>Ile</sup><sub>LAU</sub> to A-site AUA or AUG programmed 70S ribosome complexes.** Binding of the *E. coli* ternary complex of EF-Tu, guanosine 5'- $\beta$ , $\gamma$ -methylenetriphosphate, and Ile-tRNA<sup>Ile</sup><sub>LAU</sub> to the 70S ribosome programmed with the cognate AUA (lanes 1-4) or near-cognate AUG (lanes 5-8) codon in the A site, analyzed by SDS-PAGE after centrifugation through a sucrose cushion. Gel lanes labeled (s) and (p) are proteins in the supernatant and pellet fractions, respectively. EF-Tu•GDP•Ile-tRNA<sup>Ile</sup><sub>LAU</sub> binds to the 70S ribosome with the AUA codon programmed in the A site similarly in the absence (lane 2) or presence (lane 4) of paromomycin. EF-Tu•GDP•Ile-tRNA<sup>Ile</sup><sub>LAU</sub> binds to the 70S ribosome programmed with the near-cognate AUG codon in A site with low apparent affinity with or without paromomycin (lanes 6 and 8). The results are representative of three independent experiments.

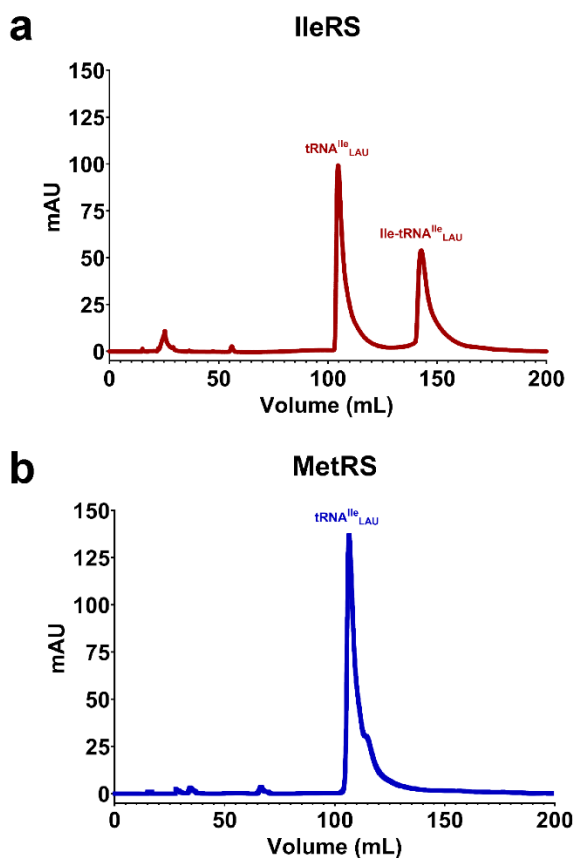

**Supplementary Fig. 4. Aminoacylation reactions of tRNA<sup>Ile</sup><sub>LAU</sub> analyzed by reverse-phase HPLC.** Aminoacylation of tRNA<sup>Ile</sup><sub>LAU</sub> by *E. coli* IleRS (**a**) or *E. coli* MetRS (**b**). The purified tRNA<sup>Ile</sup><sub>LAU</sub> is only aminoacylated by IleRS and does not show any peak for aminoacylated-tRNA<sup>Ile</sup> following incubation with MetRS, confirming that lysidinylated-tRNA<sup>Ile</sup> is recognized exclusively by IleRS, as reported<sup>2</sup>.

**Supplementary References**

1. Rozov, A. et al. Importance of potassium ions for ribosome structure and function revealed by long-wavelength X-ray diffraction. *Nat. Commun.* **10**, 2519 (2019).
2. Nakanishi, K. et al. Structural basis for translational fidelity ensured by transfer RNA lysidine synthetase. *Nature* **461**, 1144-1148 (2009).
